# Supplementary material for: Study of a color-tunable long afterglow phosphor Gd1.5Y1.5Ga3Al2O12:Tb3+: luminescence properties and mechanism
Source: Royal Society of Chemistry journal article supplement (doi:10.1039/d0ra02942d), 2020-01-01
Supplement: d0ra02942d1.pdf [file d0ra02942d1.pdf]

## Supporting Information

### Study of a color tunable long afterglow phosphor

#### **Gd<sub>1.5</sub>Y<sub>1.5</sub>Ga<sub>3</sub>Al<sub>2</sub>O<sub>12</sub>:Tb<sup>3+</sup>: luminescence properties and mechanism**

Tengfei Ma<sup>a,b</sup>, Haifeng Li<sup>a</sup>, Su Zhang<sup>a,\*</sup>, Wenzhi Sun<sup>c</sup>, Zhiqiang Cheng<sup>b</sup>, Ran Pang<sup>a</sup>, Jing Feng<sup>a</sup>,  
Lihong Jiang<sup>a</sup>, Da Li<sup>a</sup>, Chengyu Li<sup>a,\*</sup>

<sup>a</sup> State Key Laboratory of Rare Earth Resources Utilization, Changchun Institute of Applied Chemistry, Chinese Academy of Sciences, Changchun 130022, P. R. China

<sup>b</sup> Shandong Industrial Ceramic Research & Design Institute Co., Ltd., Zibo 255000, Shandong Province, P. R. China

<sup>c</sup> School of Materials Science and Engineering, Liaocheng University, Liaocheng 252059, P. R. China.

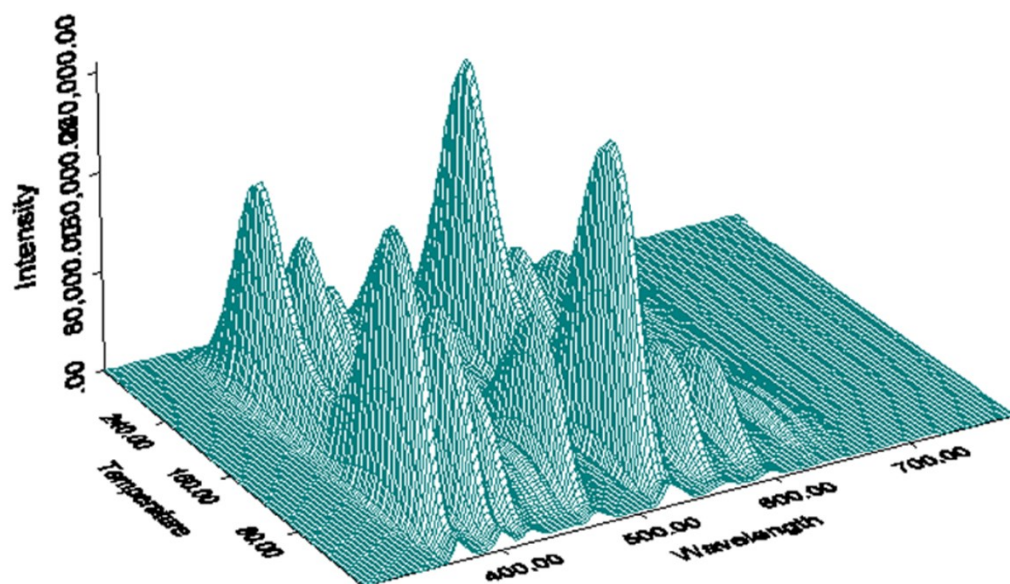

**Figure S1.** 3D-TL spectrum of the GYGA:0.01Tb<sup>3+</sup> sample taken as an example to show the TL properties.

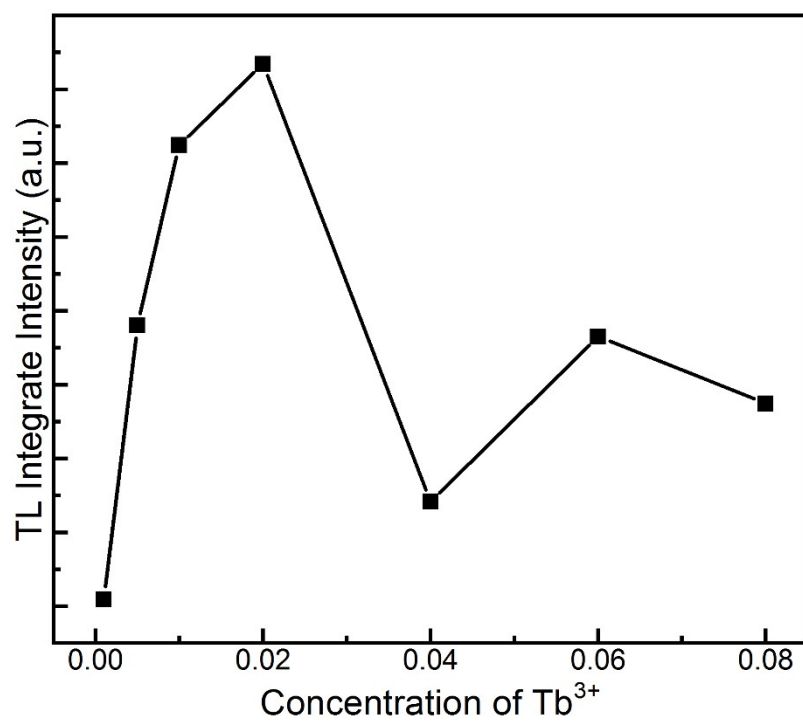

**Figure S2.** Integrated intensity of TL spectra of YAGG:xTb<sup>3+</sup> as a function of the concentration of the dopant Tb<sup>3+</sup>

**Table S1.** CIE chromaticity coordinates (CC) of YAGG:xTb<sup>3+</sup> (x = 0.001-0.08)

| x         | 0.001             | 0.005             | 0.01              | 0.02              | 0.04              | 0.06              | 0.08              |
|-----------|-------------------|-------------------|-------------------|-------------------|-------------------|-------------------|-------------------|
| Afterglow | (0.22, 0.18)      | (0.26, 0.27)      | (0.30, 0.33)      | (0.33, 0.43)      | (0.35, 0.50)      | (0.35, 0.52)      | (0.37, 0.54)      |
| PL        | (0.196,<br>0.154) | (0.218,<br>0.226) | (0.236,<br>0.287) | (0.266,<br>0.392) | (0.298,<br>0.488) | (0.313,<br>0.525) | (0.322,<br>0.543) |
